# Supplementary material
Source: PubMed Central journal article supplement (PMC4407208)
Supplement: AEM.00294-15_zam999116230so1.pdf [file AEM.00294-15_zam999116230so1.pdf]

## Supplementary information

### Metabolic profiling of *Geobacter sulfurreducens* during scale-up

Howbeer Muhamadali, Yun Xu, David I. Ellis, J. William Allwood, Nicholas J.W. Rattray, Elon Correa, Haitham Arabiah, Jonathan R. Lloyd and Royston Goodacre

NBAF medium contained: 9.3 g L<sup>-1</sup> fumaric acid (electron acceptor), 4.1 g L<sup>-1</sup> sodium acetate (electron donor), 0.04 g L<sup>-1</sup> CaCl<sub>2</sub>.2H<sub>2</sub>O, 0.1 g L<sup>-1</sup> MgSO<sub>4</sub>.7H<sub>2</sub>O, 1.8 g L<sup>-1</sup> NaHCO<sub>3</sub>, 0.5 g L<sup>-1</sup> Na<sub>2</sub>CO<sub>3</sub>, 1 mL L<sup>-1</sup> Na<sub>2</sub>SeO<sub>4</sub> (1mM), 10 mL L<sup>-1</sup> nitrogen and buffer mix, 10 mL L<sup>-1</sup> mineral elixir mix, 15 mL L<sup>-1</sup> vitamin mix (full details of these solutions are available in the supplementary information). The pH of the media was adjusted to 7.1 using NaOH and degassed by purging with N<sub>2</sub>:CO<sub>2</sub> (80:20) gas under sterile conditions for 45-60 min.

**Table S1.** Additional components required for preparation of NBAF.

| Component         | Compound                                               | Concentration           |
|-------------------|--------------------------------------------------------|-------------------------|
| 100× NB Mix       | KH <sub>2</sub> PO <sub>4</sub> (monobasic)            | 42.0 g L <sup>-1</sup>  |
|                   | K <sub>2</sub> HPO <sub>4</sub> (dibasic)              | 22.0 g L <sup>-1</sup>  |
|                   | NH <sub>4</sub> Cl                                     | 20.0 g L <sup>-1</sup>  |
|                   | KCl                                                    | 38.0 g L <sup>-1</sup>  |
|                   | NaCl                                                   | 36.0 g L <sup>-1</sup>  |
| NB Mineral Elixir | Nitrilotriacetic acid                                  | 2.14 g L <sup>-1</sup>  |
|                   | MnCl <sub>2</sub> .4H <sub>2</sub> O                   | 0.1 g L <sup>-1</sup>   |
|                   | FeSO <sub>4</sub> .7H <sub>2</sub> O                   | 0.3 g L <sup>-1</sup>   |
|                   | CoCl <sub>2</sub> .6H <sub>2</sub> O                   | 0.17 g L <sup>-1</sup>  |
|                   | ZnSO <sub>4</sub> .7H <sub>2</sub> O                   | 0.20 g L <sup>-1</sup>  |
|                   | CuCl <sub>2</sub> .2H <sub>2</sub> O                   | 0.03 g L <sup>-1</sup>  |
|                   | AlK(SO <sub>4</sub> ) <sub>2</sub> .12H <sub>2</sub> O | 0.005 g L <sup>-1</sup> |
|                   | H <sub>3</sub> BO <sub>3</sub>                         | 0.005 g L <sup>-1</sup> |
|                   | Na <sub>2</sub> MoO <sub>4</sub>                       | 0.09 g L <sup>-1</sup>  |
|                   | NiSO <sub>4</sub> .6H <sub>2</sub> O                   | 0.11 g L <sup>-1</sup>  |
|                   | Na <sub>2</sub> WO <sub>4</sub> .2H <sub>2</sub> O     | 0.02 g L <sup>-1</sup>  |
| Vitamin mix       | Biotin                                                 | 2.0 mg L <sup>-1</sup>  |
|                   | Folic acid                                             | 2.0 mg L <sup>-1</sup>  |
|                   | Pyridoxine HCl                                         | 10.0 mg L <sup>-1</sup> |
|                   | Riboflavin                                             | 5.0 mg L <sup>-1</sup>  |
|                   | Thiamine                                               | 5.0 mg L <sup>-1</sup>  |
|                   | Nicotinic acid                                         | 5.0 mg L <sup>-1</sup>  |
|                   | Pantothenic acid                                       | 5.0 mg L <sup>-1</sup>  |
|                   | B-12                                                   | 0.1 mg L <sup>-1</sup>  |
|                   | <i>p</i> -aminobenzoic acid                            | 5.0 mg L <sup>-1</sup>  |
|                   | Thioctic acid                                          | 5.0 mg L <sup>-1</sup>  |

**Table S2.** List of the top 17 significant metabolites identified by CCA. All identifications are based on minimum metabolite reporting standards (1).

| Variable ID | RT      | RI     | QM  | Metabolite           | MSI ID level | chEBI code |
|-------------|---------|--------|-----|----------------------|--------------|------------|
| 9           | 403.843 | 1168.9 | 174 | pyruvic acid         | 1            | 32816      |
| 16          | 444.843 | 1253.1 | 205 | glycerol             | 2            | 17754      |
| 18          | 449.143 | 1261.9 | 174 | unknown              | 4            | -          |
| 22          | 467.643 | 1300   | 233 | malonic acid         | 1            | 30794      |
| 43          | 523.893 | 1415.5 | 245 | fumaric acid         | 1            | 18012      |
| 54          | 573.443 | 1524.3 | 233 | malic acid           | 1            | 6650       |
| 59          | 598.743 | 1597.1 | 245 | unknown              | 4            | -          |
| 62          | 625.643 | 1674.5 | 158 | oxaloacetic acid     | 2            | 30744      |
| 64          | 635.293 | 1702.3 | 230 | 5-oxoproline         | 1            | 16010      |
| 66          | 651.593 | 1749.2 | 179 | nicotinamide         | 1            | 17154      |
| 70          | 669.293 | 1800.1 | 299 | glycerol-3-phosphate | 2            | 15978      |
| 71          | 674.093 | 1813.9 | 211 | unknown              | 4            | -          |
| 74          | 683.393 | 1840.7 | 211 | citric acid          | 1            | 30769      |
| 77          | 708.593 | 1916   | 290 | unknown              | 4            | -          |
| 82          | 768.293 | 2124.3 | 264 | adenine              | 1            | 16708      |
| 93          | 847.593 | 2400.9 | 121 | unknown              | 4            | -          |
| 97          | 873.043 | 2489.7 | 361 | unknown              | 4            | -          |

Code: ID, identifier on plots; RT, retention time; RI, retention index; QM, quant mass; MSI, Metabolomics Standards Initiative identification level; for chEBI codes see: <https://www.ebi.ac.uk/chebi/>

Note that these are the identities for the acids and not the charged species and that due to conventions we refer to fumaric acid as fumarate in the text.

- (1) **Sumner LW, Amberg A, Barrett D, Beale MH, Beger R, Daykin CA, Fan TWM, Fiehn O, Goodacre R, Griffin JL and others.** 2007. Proposed minimum reporting standards for chemical analysis. *Metabolomics*; **3**:211-221.

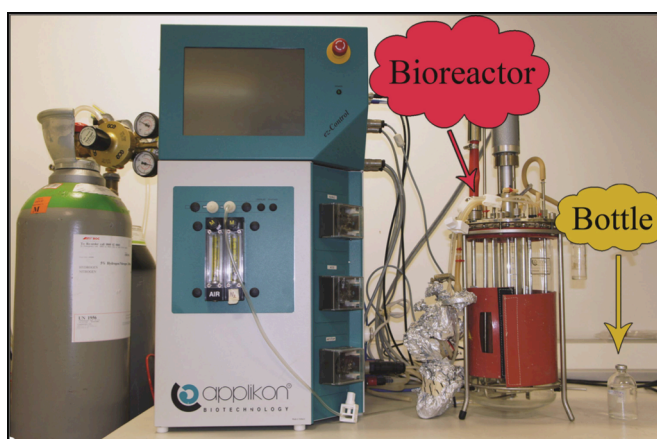

**Figure S1.** The 7 L bioreactor (which we filled with 5 L medium) and the 120 mL serum bottles (filled with 100 mL of medium) used for cultivation of *G. sulfurreducens* during the experiment.

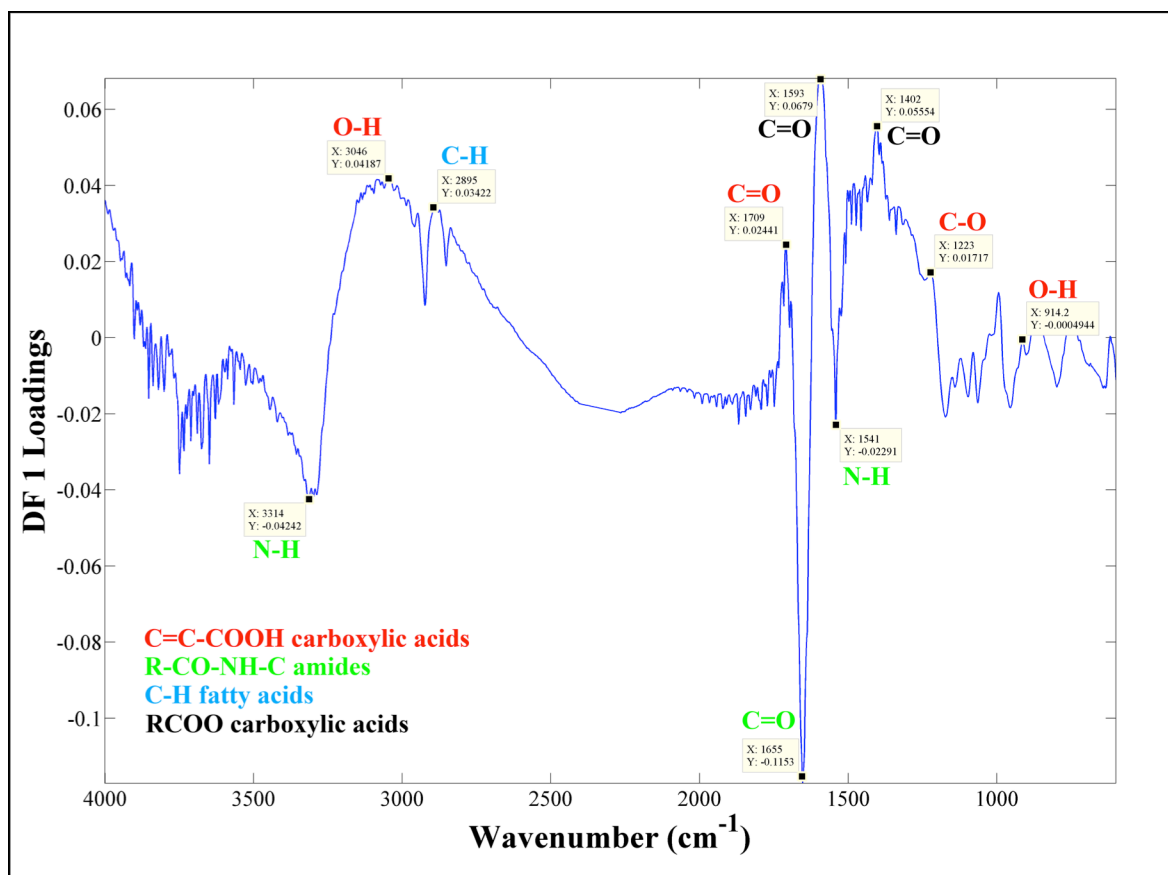

**Figure S2.** PC-DF1 loadings plot of the FT-IR spectra from the first 48 h samples collected from both cultivation conditions.

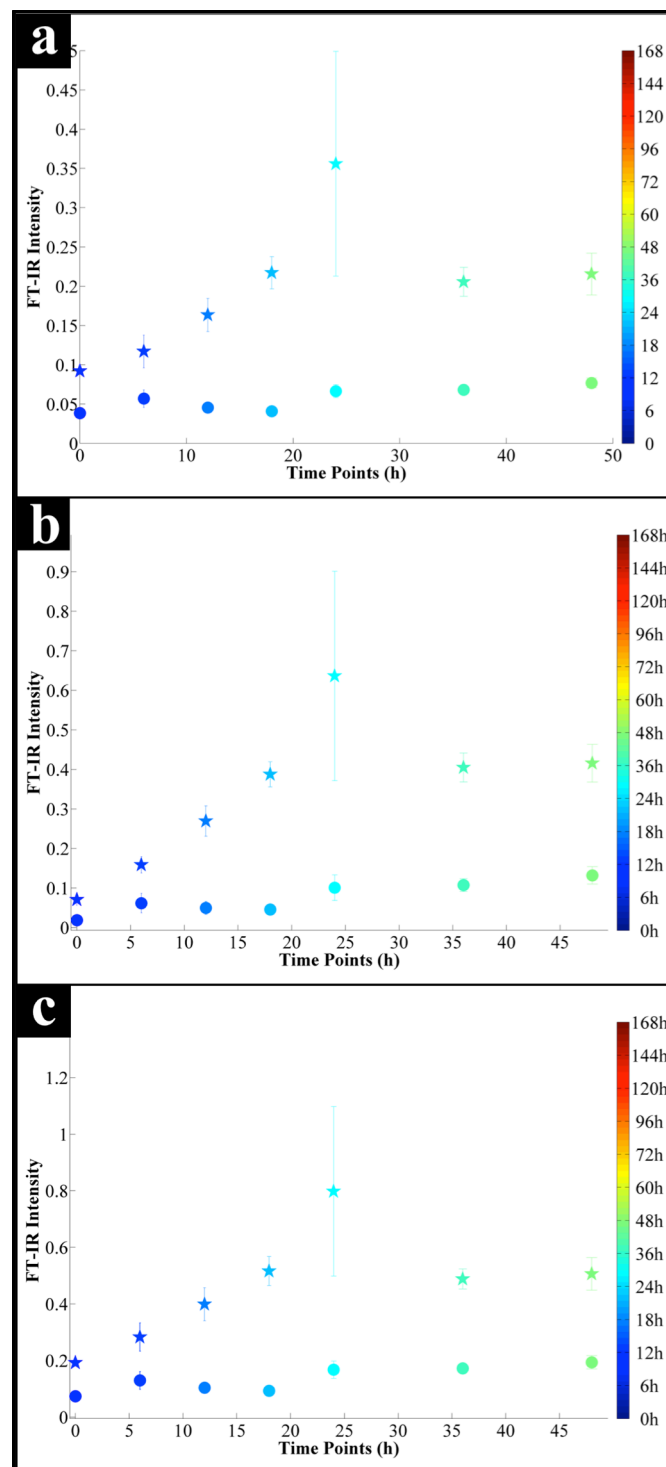

**Figure S3.** Comparison of the intensity of significant FT-IR vibrations identified by the PC-DFA loadings plot (Figure S2) of serum bottles (star) and bioreactor (circle) samples during the first 48 h of incubation. **(a)** 3046  $\text{cm}^{-1}$  region of stretching of O-H bonds in carboxylic acids, **(b)** 1593  $\text{cm}^{-1}$  region of asymmetric stretching of C=O bonds in carboxylic acids, **(c)** 3314  $\text{cm}^{-1}$  region for stretching of N-H of amides where C=O and N-H are in *trans* configuration. Data points represent the mean centre of three replicates with bars indicating the relative standard deviation.

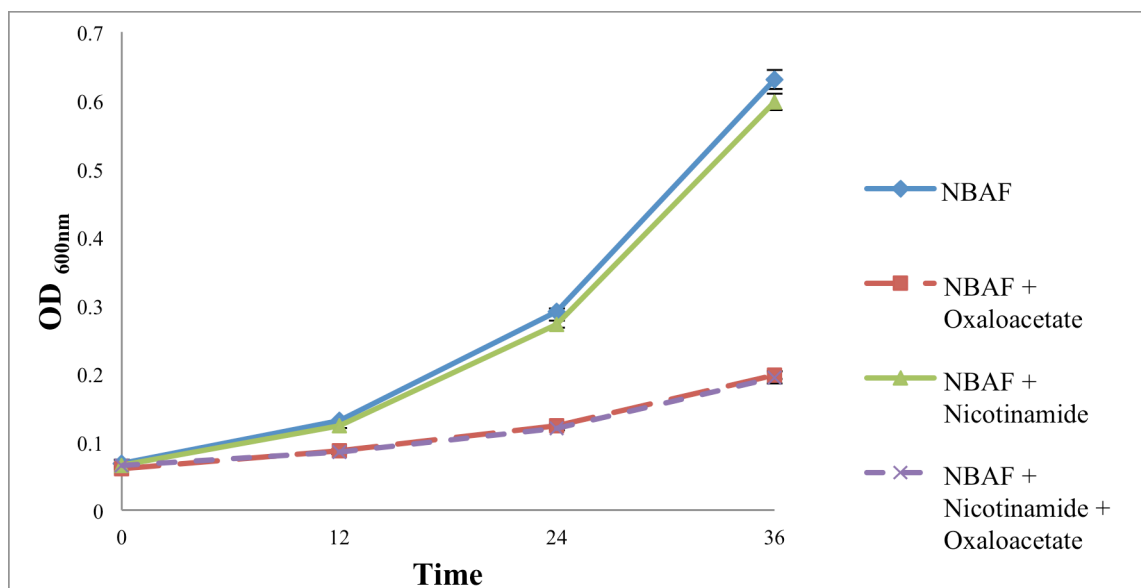

**Figure S4.** Growth curves of *G. sulfurreducens* incubated in 100 mL serum bottles at 30 °C for 36h using NBAF (blue line), and supplemented with oxaloacetate (red line), nicotinamide (green line) or both (purple dotted line). The data points are average of three biological replicates with bars representing the standard deviation.

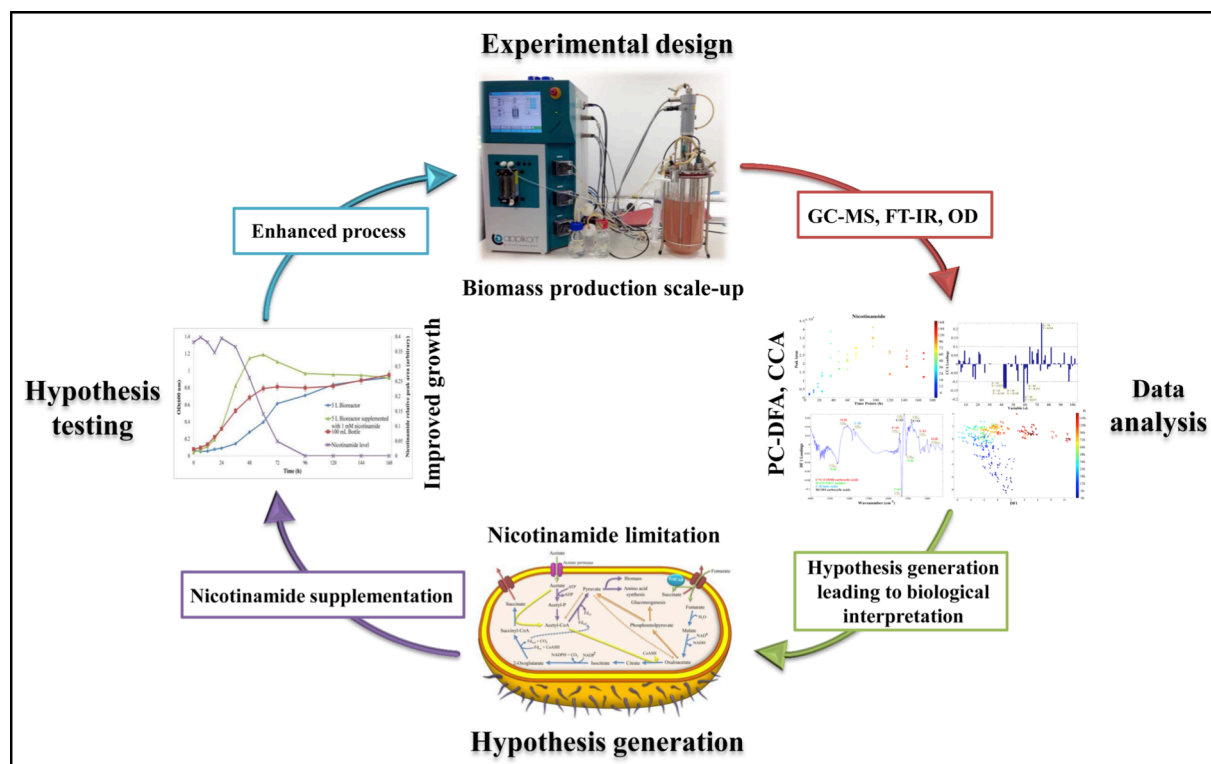

**Figure S5.** The cycle of inductive approach to knowledge discovery employed as the main strategy in this study for identification of growth-limiting metabolites during the scale-up process, and using these findings towards optimisation and enhancement of the bioprocess.
